# Supplementary material
Source: PubMed Central journal article supplement (PMC3503106)

**Supplemental Table 1.** Samples from HPS cases and rodents used in this study. N/A indicates that the virus present in this sample could not be determined.

| Sample                | Source                       | Type    | State       | Year | Hantavirus |
|-----------------------|------------------------------|---------|-------------|------|------------|
| H695687               | HPS case                     | blood   | Mato Grosso | 2005 | LANV-2     |
| H704376               | HPS case                     | blood   | Mato Grosso | 2006 | LANV-2     |
| H704385               | HPS case                     | blood   | Mato Grosso | 2006 | LANV-2     |
| H705167               | HPS case                     | blood   | Mato Grosso | 2006 | LANV-2     |
| H711859               | HPS case                     | blood   | Mato Grosso | 2006 | LANV-2     |
| H711879               | HPS case                     | blood   | Mato Grosso | 2006 | LANV-2     |
| H711891 <sup>37</sup> | HPS case                     | blood   | Mato Grosso | 2006 | LANV-2     |
| H712515               | HPS case                     | blood   | Mato Grosso | 2006 | LANV-2     |
| H712551               | HPS case                     | blood   | Mato Grosso | 2006 | LANV-2     |
| H713170               | HPS case                     | blood   | Mato Grosso | 2006 | LANV-2     |
| H713174               | HPS case                     | blood   | Mato Grosso | 2006 | LANV-2     |
| H708928 <sup>35</sup> | HPS case                     | blood   | Mato Grosso | 2006 | N/A        |
| H722027               | HPS case                     | blood   | Mato Grosso | 2007 | LANV-2     |
| H722028               | HPS case                     | blood   | Mato Grosso | 2007 | LANV-2     |
| H731172               | HPS case                     | blood   | Mato Grosso | 2007 | LANV-2     |
| H736253               | HPS case                     | blood   | Mato Grosso | 2007 | LANV-2     |
| H745332 <sup>35</sup> | HPS case                     | blood   | Pará        | 2008 | CASV       |
| H745427 <sup>35</sup> | HPS case                     | blood   | Pará        | 2008 | CASV       |
| H752463               | HPS case                     | serum   | Amazonas    | 2008 | N/A        |
| H756122               | HPS case                     | serum   | Belém       | 2009 | N/A        |
| H756921               | HPS case                     | serum   | Pará        | 2009 | N/A        |
| H758031               | HPS case                     | serum   | Rondônia    | 2009 | CASV       |
| H759272               | HPS case                     | serum   | Amazonas    | 2009 | N/A        |
| H759273               | HPS case                     | serum   | Amazonas    | 2009 | CASV       |
| H741506               | HPS case                     | serum   | Rondônia    | 2009 | N/A        |
| H759113               | HPS case                     | viscera | Maranhão    | 2009 | ANJV       |
| AN683313              | <i>Oligoryzomys microtis</i> | liver   | Amazonas    | 2004 | RIOMV-3    |
| AN683314              | <i>Oligoryzomys microtis</i> | liver   | Amazonas    | 2004 | N/A        |
| AN683316              | <i>Oligoryzomys microtis</i> | liver   | Amazonas    | 2004 | N/A        |
| AN683318              | <i>Oligoryzomys microtis</i> | liver   | Amazonas    | 2004 | N/A        |
| AN693223              | <i>Oligoryzomys</i> sp.      | liver   | Rondônia    | 2005 | RIOMV-4    |
| AN693227              | <i>Oligoryzomys</i> sp.      | liver   | Rondônia    | 2005 | RIOMV-4    |
| AN693229              | <i>Oligoryzomys</i> sp.      | liver   | Rondônia    | 2005 | RIOMV-4    |
| AN693231              | <i>Oligoryzomys</i> sp.      | liver   | Rondônia    | 2005 | RIOMV-4    |
| AN693239              | <i>Oligoryzomys</i> sp.      | liver   | Rondônia    | 2005 | RIOMV-4    |
| AN693799              | <i>Oligoryzomys</i> sp.      | lung    | Rondônia    | 2005 | RIOMV-4    |
| AN693800              | <i>Oligoryzomys</i> sp.      | lung    | Rondônia    | 2005 | RIOMV-4    |
| AN693240              | <i>Oligoryzomys</i> sp.      | liver   | Rondônia    | 2005 | RIOMV-4    |

|                        |                                  |       |             |      |         |
|------------------------|----------------------------------|-------|-------------|------|---------|
| AN693242               | <i>Oligoryzomys</i> sp.          | liver | Rondônia    | 2005 | RIOMV-4 |
| AN693802               | <i>Oligoryzomys</i> sp.          | lung  | Rondônia    | 2005 | RIOMV-4 |
| AN693244               | <i>Oligoryzomys</i> sp.          | liver | Rondônia    | 2005 | N/A     |
| AN693247               | <i>Oligoryzomys</i> sp.          | liver | Rondônia    | 2005 | RIOMV-4 |
| AN693248               | <i>Oligoryzomys</i> sp.          | liver | Rondônia    | 2005 | RIOMV-4 |
| AN693251               | <i>Oligoryzomys</i> sp.          | liver | Rondônia    | 2005 | RIOMV-4 |
| AN693262               | <i>Oligoryzomys</i> sp.          | liver | Rondônia    | 2005 | RIOMV-4 |
| AN693269               | <i>Oligoryzomys</i> sp.          | liver | Rondônia    | 2005 | RIOMV-4 |
| AN693277               | <i>Oligoryzomys</i> sp.          | liver | Rondônia    | 2005 | RIOMV-4 |
| AN693288               | <i>Oligoryzomys</i> sp.          | liver | Rondônia    | 2005 | RIOMV-4 |
| AN693292               | <i>Oligoryzomys</i> sp.          | liver | Rondônia    | 2005 | RIOMV-4 |
| AN693307               | <i>Oligoryzomys</i> sp.          | liver | Rondônia    | 2005 | RIOMV-4 |
| AN693338               | <i>Oligoryzomys</i> sp.          | liver | Rondônia    | 2005 | RIOMV-4 |
| AN711258 <sup>35</sup> | <i>Oligoryzomys utiaritensis</i> | lung  | Mato Grosso | 2006 | CASV-2  |
| AN717307 <sup>36</sup> | <i>Oligoryzomys utiaritensis</i> | lung  | Mato Grosso | 2006 | CASV-2  |
| AN717313 <sup>36</sup> | <i>Oligoryzomys utiaritensis</i> | lung  | Mato Grosso | 2006 | CASV-2  |
| AN729965 <sup>36</sup> | <i>Oligoryzomys utiaritensis</i> | heart | Mato Grosso | 2007 | CASV-2  |

<sup>35</sup>Medeiros et al. 2010

<sup>36</sup>Travassos da Rosa et al. 2011

<sup>37</sup>Travassos da Rosa et al. 2012

**Supplemental Table 2.** *Oligoryzomys* rodents included in the phylogenetic tree.

| Species                            | GenBank Accession Number | Location   |
|------------------------------------|--------------------------|------------|
| <i>Oligoryzomys andinus</i>        | AY452200                 | N/A        |
|                                    | GU393999                 | Bolivia    |
| <i>Oligoryzomys chacoensis</i>     | EU258543                 | Paraguay   |
|                                    | GU185904                 | Argentina  |
| <i>Oligoryzomys destructor</i>     | EU192171                 | Argentina  |
|                                    | EU258544                 |            |
| <i>Oligoryzomys utiaritensis</i>   | JQ013750                 | Brazil     |
|                                    | JQ013761                 |            |
| <i>Oligoryzomys flavescens</i>     | GU185913                 | Argentina  |
|                                    | GU185920                 |            |
| <i>Oligoryzomys fornesi</i>        | GU185917                 | Argentina  |
|                                    | GU185918                 |            |
| <i>Oligoryzomys fulvescens</i>     | DQ227457                 | N/A        |
|                                    | EU258546                 | Suriname   |
| <i>Oligoryzomys longicaudatus</i>  | GU393998                 | Argentina  |
|                                    | JN034451                 | Chile      |
| <i>Oligoryzomys messorius</i>      | DQ826024                 | Brazil     |
| <i>Oligoryzomys microtis</i>       | AY439000                 | Bolivia    |
|                                    | EU192172                 | Bolivia    |
|                                    | EU258549                 | Brazil     |
|                                    | HM594624                 | Peru       |
|                                    | FJ374766                 | Brazil     |
| <i>Oligoryzomys moojeni</i>        | DQ826016                 | Brazil     |
|                                    | JQ013768                 |            |
|                                    | JQ013771                 |            |
| <i>Oligoryzomys nigripes</i>       | EU258550                 | Paraguay   |
|                                    | GQ259905                 | Brazil     |
| <i>Oligoryzomys rupestris</i>      | JQ013763                 | Brazil     |
|                                    | JQ013764                 |            |
| <i>Oligoryzomys</i> sp. RR-2010a   | HM594618                 | Brazil     |
| <i>Oligoryzomys</i> sp. 1 MIC210   | EU192167                 | Argentina  |
| <i>Oligoryzomys</i> sp. 2 MIC203   | EU192169                 | Argentina  |
| <i>Oligoryzomys</i> sp. B MUSA2625 | EU192159                 | Peru       |
| <i>Oligoryzomys</i> sp. MN37756    | DQ826025                 | Brazil     |
| <i>Oligoryzomys stramineus</i>     | JQ013747                 | Brazil     |
| <i>Oligoryzomys vegetus</i>        | EU192165                 | Costa Rica |
| <i>Oligoryzomys magellanicus</i>   | AY275705                 | N/A        |

**Supplemental Table 3.** Pairwise percent genetic distance for the L segment (A), M segment (B) and S segment (C) of all *Sigmodontinae*-borne hantaviruses. Amino acid distances are above the diagonal and nucleotide distances are below. The sequences generated in this study are shown in red, all partial sequences are indicated with an \*.

**A**

|         | LANV-2 | LANV* | CASV* | CASV-2 | ANDV  | SNV   | CCV   | CHOV  | MAPV  | RIOMV-4 | MARV  | RIOMV | MONV  | CARV  |
|---------|--------|-------|-------|--------|-------|-------|-------|-------|-------|---------|-------|-------|-------|-------|
| LANV-2  |        | 0.030 | 0.090 | 0.115  | 0.110 | 0.145 | 0.146 | 0.114 | 0.096 | 0.070   | 0.060 | 0.059 | 0.168 | 0.164 |
| LANV*   | 0.213  |       | 0.255 | 0.146  | 0.103 | 0.155 | 0.141 | 0.151 | 0.123 | 0.081   | 0.050 | 0.075 | 0.154 | 0.188 |
| CASV*   | 0.300  | 0.395 |       | 0.023  | 0.049 | 0.110 | 0.113 | 0.111 | 0.090 | 0.082   | 0.083 | 0.079 | 0.139 | 0.141 |
| CASV-2  | 0.303  | 0.338 | 0.192 |        | 0.064 | 0.148 | 0.149 | 0.143 | 0.116 | 0.107   | 0.107 | 0.109 | 0.177 | 0.175 |
| ANDV    | 0.293  | 0.267 | 0.265 | 0.270  |       | 0.145 | 0.147 | 0.132 | 0.118 | 0.106   | 0.101 | 0.104 | 0.177 | 0.166 |
| SNV     | 0.324  | 0.327 | 0.315 | 0.339  | 0.331 |       | 0.009 | 0.154 | 0.146 | 0.152   | 0.140 | 0.143 | 0.143 | 0.139 |
| CCV     | 0.320  | 0.329 | 0.316 | 0.348  | 0.341 | 0.133 |       | 0.154 | 0.145 | 0.152   | 0.137 | 0.142 | 0.143 | 0.139 |
| CHOV    | 0.324  | 0.333 | 0.327 | 0.333  | 0.319 | 0.340 | 0.329 |       | 0.122 | 0.120   | 0.120 | 0.116 | 0.179 | 0.167 |
| MAPV    | 0.302  | 0.308 | 0.297 | 0.300  | 0.308 | 0.340 | 0.340 | 0.317 |       | 0.100   | 0.098 | 0.095 | 0.163 | 0.164 |
| RIOMV-4 | 0.265  | 0.245 | 0.301 | 0.297  | 0.307 | 0.355 | 0.349 | 0.321 | 0.291 |         | 0.054 | 0.043 | 0.172 | 0.161 |
| MARV    | 0.258  | 0.228 | 0.297 | 0.316  | 0.307 | 0.352 | 0.339 | 0.308 | 0.293 | 0.232   |       | 0.043 | 0.163 | 0.154 |
| RIOMV   | 0.251  | 0.259 | 0.282 | 0.303  | 0.303 | 0.338 | 0.338 | 0.318 | 0.294 | 0.211   | 0.215 |       | 0.158 | 0.155 |
| MONV    | 0.339  | 0.331 | 0.330 | 0.354  | 0.353 | 0.331 | 0.321 | 0.360 | 0.350 | 0.351   | 0.338 | 0.338 |       | 0.146 |
| CARV    | 0.337  | 0.356 | 0.326 | 0.353  | 0.342 | 0.320 | 0.332 | 0.332 | 0.330 | 0.337   | 0.333 | 0.331 | 0.306 |       |

B (page 1 of 2)

|                | MAPV  | CHOV  | LANV  | LANV-2 | ALPA* | RIOMV-4 | RIOMV-3* | RIOMV Peru | MARV  | RIOMV Bolivia* | JUQV-like* | ANDV  | TUNV* | CASV-2 | CASV* |
|----------------|-------|-------|-------|--------|-------|---------|----------|------------|-------|----------------|------------|-------|-------|--------|-------|
| MAPV           |       | 0.194 | 0.211 | 0.208  | 0.098 | 0.189   | 0.110    | 0.175      | 0.173 | 0.110          | 0.081      | 0.176 | 0.111 | 0.185  | 0.147 |
| CHOV           | 0.367 |       | 0.209 | 0.208  | 0.068 | 0.201   | 0.139    | 0.191      | 0.202 | 0.068          | 0.108      | 0.200 | 0.132 | 0.203  | 0.149 |
| LANV           | 0.359 | 0.389 |       | 0.041  | 0.062 | 0.104   | 0.061    | 0.092      | 0.097 | 0.045          | 0.086      | 0.149 | 0.102 | 0.153  | 0.122 |
| LANV-2         | 0.362 | 0.376 | 0.197 |        | 0.051 | 0.102   | 0.055    | 0.096      | 0.099 | 0.062          | 0.073      | 0.153 | 0.100 | 0.153  | 0.116 |
| ALPA*          | 0.258 | 0.266 | 0.267 | 0.308  |       | 0.034   | 0.051    | 0.051      | 0.039 | 0.056          | 0.039      | 0.08  | 0.046 | 0.062  | 0.045 |
| RIOMV-4        | 0.342 | 0.367 | 0.278 | 0.276  | 0.244 |         | 0.026    | 0.050      | 0.053 | 0.034          | 0.076      | 0.142 | 0.083 | 0.137  | 0.103 |
| RIOMV-3*       | 0.302 | 0.345 | 0.275 | 0.262  | 0.228 | 0.193   |          | 0.019      | 0.027 | 0.028          | 0.070      | 0.100 | 0.088 | 0.099  | 0.093 |
| RIOMV Peru     | 0.331 | 0.357 | 0.274 | 0.283  | 0.228 | 0.214   | 0.195    |            | 0.039 | 0.006          | 0.067      | 0.138 | 0.093 | 0.134  | 0.097 |
| MARV           | 0.343 | 0.360 | 0.278 | 0.276  | 0.255 | 0.236   | 0.214    | 0.226      |       | 0.028          | 0.054      | 0.137 | 0.085 | 0.133  | 0.101 |
| RIOMV Bolivia* | 0.249 | 0.283 | 0.230 | 0.276  | 0.230 | 0.209   | 0.216    | 0.002      | 0.217 |                | 0.062      | 0.074 | 0.074 | 0.085  | 0.062 |
| JUQV-like*     | 0.272 | 0.271 | 0.302 | 0.284  | 0.250 | 0.284   | 0.269    | 0.270      | 0.256 | 0.280          |            | 0.056 | 0.041 | 0.054  | 0.048 |
| ANDV           | 0.343 | 0.367 | 0.338 | 0.326  | 0.292 | 0.334   | 0.307    | 0.315      | 0.310 | 0.259          | 0.267      |       | 0.076 | 0.088  | 0.082 |
| TUNV*          | 0.285 | 0.288 | 0.265 | 0.281  | 0.263 | 0.264   | 0.296    | 0.245      | 0.282 | 0.223          | 0.256      | 0.232 |       | 0.040  | 0.055 |
| CASV-2         | 0.346 | 0.376 | 0.335 | 0.342  | 0.270 | 0.316   | 0.315    | 0.318      | 0.309 | 0.275          | 0.271      | 0.255 | 0.141 |        | 0.066 |
| CASV*          | 0.313 | 0.335 | 0.299 | 0.295  | 0.274 | 0.288   | 0.293    | 0.295      | 0.302 | 0.267          | 0.258      | 0.28  | 0.192 | 0.199  |       |
| CASV*          | 0.307 | 0.325 | 0.286 | 0.299  | 0.277 | 0.286   | 0.293    | 0.294      | 0.301 | 0.267          | 0.258      | 0.266 | 0.193 | 0.194  | 0.008 |
| Hu39694        | 0.326 | 0.367 | 0.331 | 0.324  | 0.309 | 0.326   | 0.311    | 0.321      | 0.319 | 0.276          | 0.240      | 0.262 | 0.226 | 0.259  | 0.266 |
| PERV*          | 0.306 | 0.318 | 0.281 | 0.288  | 0.297 | 0.303   | 0.284    | 0.303      | 0.287 | 0.271          | 0.253      | 0.275 | 0.238 | 0.271  | 0.263 |
| MACV*          | 0.320 | 0.340 | 0.317 | 0.324  | 0.280 | 0.313   | 0.341    | 0.308      | 0.317 | 0.312          | 0.275      | 0.252 | 0.248 | 0.280  | 0.269 |
| ARQV*          | 0.305 | 0.336 | 0.294 | 0.288  | 0.297 | 0.310   | 0.30     | 0.300      | 0.282 | 0.284          | 0.289      | 0.249 | 0.248 | 0.246  | 0.270 |
| ORNV           | 0.340 | 0.362 | 0.325 | 0.324  | 0.262 | 0.330   | 0.292    | 0.318      | 0.309 | 0.256          | 0.226      | 0.269 | 0.243 | 0.277  | 0.261 |
| BMJV*          | 0.313 | 0.317 | 0.303 | 0.313  | 0.314 | 0.306   | 0.290    | 0.286      | 0.263 | 0.276          | 0.252      | 0.252 | 0.245 | 0.256  | 0.266 |
| BMJV-NEBU*     | 0.251 | 0.300 | 0.279 | 0.255  | 0.308 | 0.271   | 0.272    | 0.265      | 0.255 | 0.267          | 0.221      | 0.226 | 0.211 | 0.239  | 0.239 |
| LECV           | 0.332 | 0.371 | 0.326 | 0.323  | 0.303 | 0.314   | 0.281    | 0.316      | 0.326 | 0.264          | 0.251      | 0.268 | 0.231 | 0.258  | 0.256 |

(page 2 of 2)

|                | CASV* | Hu 39694 | PERV* | MACV* | ARQV* | ORNV  | BMJV* | BMJV-NEBU* | LECV  |
|----------------|-------|----------|-------|-------|-------|-------|-------|------------|-------|
| MAPV           | 0.124 | 0.176    | 0.116 | 0.135 | 0.110 | 0.177 | 0.101 | 0.056      | 0.164 |
| CHOV           | 0.128 | 0.208    | 0.147 | 0.169 | 0.140 | 0.201 | 0.138 | 0.080      | 0.193 |
| LANV           | 0.110 | 0.150    | 0.111 | 0.116 | 0.094 | 0.150 | 0.108 | 0.068      | 0.147 |
| LANV-2         | 0.102 | 0.150    | 0.109 | 0.123 | 0.105 | 0.145 | 0.104 | 0.074      | 0.146 |
| ALPA*          | 0.045 | 0.063    | 0.062 | 0.076 | 0.092 | 0.062 | 0.068 | 0.062      | 0.057 |
| RIOMV-4        | 0.099 | 0.131    | 0.126 | 0.124 | 0.102 | 0.135 | 0.107 | 0.062      | 0.125 |
| RIOMV-3*       | 0.092 | 0.096    | 0.112 | 0.115 | 0.092 | 0.088 | 0.089 | 0.057      | 0.078 |
| RIOMV Peru     | 0.091 | 0.132    | 0.108 | 0.115 | 0.105 | 0.128 | 0.092 | 0.057      | 0.121 |
| MARV           | 0.096 | 0.127    | 0.108 | 0.109 | 0.097 | 0.119 | 0.078 | 0.045      | 0.114 |
| RIOMV Bolivia* | 0.062 | 0.063    | 0.074 | 0.093 | 0.104 | 0.062 | 0.068 | 0.062      | 0.057 |
| JUQV-like*     | 0.046 | 0.036    | 0.051 | 0.081 | 0.072 | 0.033 | 0.038 | 0.022      | 0.033 |
| ANDV           | 0.073 | 0.084    | 0.089 | 0.105 | 0.082 | 0.084 | 0.061 | 0.028      | 0.073 |
| TUNV*          | 0.052 | 0.050    | 0.074 | 0.092 | 0.067 | 0.050 | 0.064 | 0.045      | 0.052 |
| CASV-2         | 0.054 | 0.083    | 0.093 | 0.109 | 0.079 | 0.093 | 0.073 | 0.050      | 0.072 |
| CASV*          | 0.004 | 0.084    | 0.096 | 0.101 | 0.077 | 0.080 | 0.077 | 0.022      | 0.074 |
| CASV*          |       | 0.064    | 0.075 | 0.087 | 0.074 | 0.060 | 0.063 | 0.022      | 0.054 |
| Hu39694        | 0.256 |          | 0.069 | 0.094 | 0.072 | 0.061 | 0.028 | 0.017      | 0.046 |
| PERV*          | 0.267 | 0.260    |       | 0.080 | 0.056 | 0.063 | 0.075 | 0.045      | 0.069 |
| MACV*          | 0.261 | 0.255    | 0.277 |       | 0.080 | 0.09  | 0.096 | 0.081      | 0.089 |
| ARQV*          | 0.263 | 0.266    | 0.237 | 0.247 |       | 0.061 | 0.069 | 0.051      | 0.064 |
| ORNV           | 0.249 | 0.225    | 0.275 | 0.261 | 0.263 |       | 0.030 | 0.011      | 0.047 |
| BMJV*          | 0.259 | 0.217    | 0.254 | 0.274 | 0.264 | 0.213 |       | 0.011      | 0.017 |
| BMJV-NEBU*     | 0.234 | 0.225    | 0.218 | 0.252 | 0.236 | 0.208 | 0.102 |            | 0.006 |
| LECV           | 0.242 | 0.227    | 0.250 | 0.268 | 0.265 | 0.223 | 0.126 | 0.121      |       |

C (page 1 of 2)

|               | MAPV  | CHOV  | JABV* | JABV  | AAIV* | LANV  | LANV-like | LANV-2 | ALPA  | RIOMM* | ANJV* | ANJV  | RIOMV-4 | RIOMV-3 | RIOMV Peru | MARV  | RIOMV Bolivia |
|---------------|-------|-------|-------|-------|-------|-------|-----------|--------|-------|--------|-------|-------|---------|---------|------------|-------|---------------|
| MAPV          |       | 0.113 | 0.137 | 0.112 | 0.147 | 0.111 | 0.108     | 0.110  | 0.107 | 0.119  | 0.060 | 0.085 | 0.090   | 0.088   | 0.087      | 0.092 | 0.087         |
| CHOV          | 0.265 |       | 0.148 | 0.123 | 0.154 | 0.130 | 0.129     | 0.126  | 0.132 | 0.147  | 0.059 | 0.111 | 0.117   | 0.111   | 0.109      | 0.113 | 0.119         |
| JABV*         | 0.281 | 0.303 |       | 0.018 | 0.012 | 0.149 | 0.135     | 0.138  | 0.122 | 0.119  | 0.060 | 0.120 | 0.130   | 0.120   | 0.120      | 0.116 | 0.120         |
| JABV          | 0.251 | 0.281 | 0.135 |       | 0.018 | 0.131 | 0.125     | 0.128  | 0.101 | 0.116  | 0.058 | 0.094 | 0.102   | 0.095   | 0.095      | 0.090 | 0.100         |
| AAIV*         | 0.276 | 0.305 | 0.044 | 0.126 |       | 0.154 | 0.140     | 0.143  | 0.124 | 0.123  | 0.073 | 0.125 | 0.132   | 0.122   | 0.122      | 0.120 | 0.129         |
| LANV          | 0.264 | 0.252 | 0.310 | 0.286 | 0.299 |       | 0.030     | 0.033  | 0.080 | 0.103  | 0.037 | 0.079 | 0.079   | 0.062   | 0.074      | 0.071 | 0.069         |
| LANV-like     | 0.266 | 0.247 | 0.290 | 0.278 | 0.293 | 0.157 |           | 0.002  | 0.077 | 0.095  | 0.044 | 0.074 | 0.081   | 0.069   | 0.076      | 0.071 | 0.069         |
| LANV-2        | 0.263 | 0.249 | 0.290 | 0.285 | 0.291 | 0.157 | 0.014     |        | 0.079 | 0.095  | 0.044 | 0.076 | 0.084   | 0.071   | 0.078      | 0.074 | 0.072         |
| ALPA          | 0.269 | 0.248 | 0.281 | 0.253 | 0.281 | 0.251 | 0.221     | 0.225  |       | 0.050  | 0.029 | 0.042 | 0.042   | 0.038   | 0.035      | 0.045 | 0.038         |
| RIOMM*        | 0.254 | 0.291 | 0.286 | 0.273 | 0.294 | 0.252 | 0.251     | 0.254  | 0.233 |        | 0.037 | 0.046 | 0.060   | 0.053   | 0.050      | 0.057 | 0.057         |
| ANJV*         | 0.244 | 0.278 | 0.245 | 0.232 | 0.232 | 0.248 | 0.222     | 0.221  | 0.229 | 0.222  |       | 0.000 | 0.044   | 0.029   | 0.022      | 0.029 | 0.022         |
| ANJV          | 0.236 | 0.274 | 0.277 | 0.253 | 0.282 | 0.234 | 0.199     | 0.203  | 0.199 | 0.194  | 0.010 |       | 0.042   | 0.033   | 0.028      | 0.037 | 0.035         |
| RIOMV-4       | 0.240 | 0.260 | 0.304 | 0.274 | 0.301 | 0.223 | 0.219     | 0.222  | 0.211 | 0.223  | 0.211 | 0.159 |         | 0.026   | 0.026      | 0.033 | 0.023         |
| RIOMV-3       | 0.241 | 0.252 | 0.269 | 0.268 | 0.282 | 0.209 | 0.227     | 0.228  | 0.198 | 0.209  | 0.199 | 0.157 | 0.146   |         | 0.016      | 0.023 | 0.023         |
| RIOMV Peru    | 0.221 | 0.246 | 0.269 | 0.261 | 0.264 | 0.216 | 0.224     | 0.223  | 0.212 | 0.197  | 0.208 | 0.158 | 0.173   | 0.148   |            | 0.025 | 0.021         |
| MARV          | 0.255 | 0.279 | 0.272 | 0.271 | 0.293 | 0.215 | 0.212     | 0.218  | 0.217 | 0.229  | 0.233 | 0.190 | 0.187   | 0.181   | 0.172      |       | 0.023         |
| RIOMV Bolivia | 0.213 | 0.265 | 0.268 | 0.266 | 0.283 | 0.202 | 0.215     | 0.217  | 0.213 | 0.209  | 0.217 | 0.157 | 0.139   | 0.152   | 0.141      | 0.158 |               |
| JUQV          | 0.226 | 0.272 | 0.284 | 0.276 | 0.288 | 0.241 | 0.248     | 0.248  | 0.279 | 0.269  | 0.251 | 0.231 | 0.232   | 0.237   | 0.244      | 0.236 | 0.246         |
| ARAUV         | 0.234 | 0.269 | 0.288 | 0.254 | 0.283 | 0.247 | 0.250     | 0.250  | 0.251 | 0.277  | 0.244 | 0.229 | 0.241   | 0.229   | 0.251      | 0.244 | 0.250         |
| JUQV-Like*    | 0.269 | 0.261 | 0.253 | 0.252 | 0.277 | 0.264 | 0.293     | 0.297  | 0.281 | 0.322  | 0.253 | 0.252 | 0.265   | 0.289   | 0.264      | 0.277 | 0.279         |
| ANDV          | 0.237 | 0.251 | 0.286 | 0.259 | 0.284 | 0.249 | 0.258     | 0.256  | 0.243 | 0.249  | 0.248 | 0.244 | 0.253   | 0.248   | 0.242      | 0.261 | 0.238         |
| TUNV          | 0.243 | 0.254 | 0.289 | 0.271 | 0.291 | 0.240 | 0.243     | 0.244  | 0.232 | 0.268  | 0.289 | 0.252 | 0.234   | 0.248   | 0.235      | 0.270 | 0.236         |
| CASV-2        | 0.249 | 0.262 | 0.293 | 0.274 | 0.297 | 0.225 | 0.252     | 0.252  | 0.257 | 0.264  | 0.250 | 0.240 | 0.237   | 0.228   | 0.239      | 0.249 | 0.227         |
| CASV          | 0.259 | 0.263 | 0.307 | 0.276 | 0.309 | 0.260 | 0.248     | 0.251  | 0.250 | 0.266  | 0.268 | 0.257 | 0.248   | 0.268   | 0.273      | 0.279 | 0.272         |
| CASV*         | 0.219 | 0.238 | 0.276 | 0.265 | 0.275 | 0.229 | 0.218     | 0.216  | 0.217 | 0.241  | 0.261 | 0.210 | 0.190   | 0.225   | 0.223      | 0.236 | 0.220         |
| PERV          | 0.248 | 0.260 | 0.310 | 0.296 | 0.310 | 0.256 | 0.246     | 0.246  | 0.270 | 0.287  | 0.226 | 0.234 | 0.270   | 0.257   | 0.266      | 0.269 | 0.245         |
| MACV          | 0.267 | 0.264 | 0.303 | 0.282 | 0.296 | 0.268 | 0.273     | 0.275  | 0.275 | 0.299  | 0.259 | 0.252 | 0.258   | 0.270   | 0.261      | 0.266 | 0.258         |
| ARQV*         | 0.213 | 0.222 | 0.280 | 0.259 | 0.277 | 0.214 | 0.238     | 0.236  | 0.242 | 0.258  | 0.256 | 0.233 | 0.215   | 0.239   | 0.227      | 0.220 | 0.205         |
| PARV*         | 0.219 | 0.224 | 0.288 | 0.244 | 0.274 | 0.224 | 0.240     | 0.236  | 0.252 | 0.248  | 0.252 | 0.237 | 0.238   | 0.249   | 0.239      | 0.241 | 0.227         |
| ORNV          | 0.238 | 0.245 | 0.307 | 0.278 | 0.304 | 0.245 | 0.266     | 0.268  | 0.255 | 0.277  | 0.229 | 0.225 | 0.243   | 0.240   | 0.226      | 0.246 | 0.222         |
| BMJV          | 0.261 | 0.258 | 0.311 | 0.267 | 0.315 | 0.244 | 0.266     | 0.267  | 0.258 | 0.273  | 0.261 | 0.231 | 0.244   | 0.241   | 0.241      | 0.245 | 0.237         |
| BMJV-NEBU     | 0.242 | 0.255 | 0.312 | 0.262 | 0.312 | 0.223 | 0.248     | 0.253  | 0.247 | 0.284  | 0.247 | 0.233 | 0.240   | 0.246   | 0.241      | 0.222 | 0.228         |
| LECV          | 0.244 | 0.258 | 0.305 | 0.269 | 0.294 | 0.237 | 0.251     | 0.250  | 0.244 | 0.284  | 0.254 | 0.230 | 0.249   | 0.238   | 0.226      | 0.240 | 0.229         |
| ACPV*         | 0.258 | 0.227 | 0.279 | 0.270 | 0.279 | 0.219 | 0.280     | 0.276  | 0.265 | 0.278  | 0.253 | 0.247 | 0.268   | 0.280   | 0.245      | 0.237 | 0.250         |

(page 2 of 2)

|               | JUQV  | ARAUV | JUQV-Like* | ANDV  | TUNV  | CASV-2 | CASV  | CASV* | PERV  | MACV  | ARQV* | PARV* | ORNV  | BMJV  | BMJV-NEBU | LECV  | ACPV* |
|---------------|-------|-------|------------|-------|-------|--------|-------|-------|-------|-------|-------|-------|-------|-------|-----------|-------|-------|
| MAPV          | 0.116 | 0.094 | 0.065      | 0.088 | 0.093 | 0.100  | 0.101 | 0.056 | 0.097 | 0.103 | 0.076 | 0.070 | 0.096 | 0.090 | 0.097     | 0.087 | 0.030 |
| CHOV          | 0.141 | 0.118 | 0.072      | 0.104 | 0.114 | 0.101  | 0.109 | 0.061 | 0.111 | 0.117 | 0.061 | 0.065 | 0.106 | 0.095 | 0.103     | 0.098 | 0.029 |
| JABV*         | 0.145 | 0.145 | 0.064      | 0.142 | 0.141 | 0.134  | 0.147 | 0.080 | 0.160 | 0.157 | 0.105 | 0.097 | 0.148 | 0.140 | 0.150     | 0.143 | 0.059 |
| JABV          | 0.144 | 0.118 | 0.063      | 0.118 | 0.123 | 0.116  | 0.126 | 0.080 | 0.135 | 0.127 | 0.104 | 0.096 | 0.124 | 0.118 | 0.126     | 0.121 | 0.059 |
| AAIV*         | 0.154 | 0.154 | 0.071      | 0.151 | 0.151 | 0.144  | 0.157 | 0.085 | 0.169 | 0.166 | 0.109 | 0.105 | 0.157 | 0.150 | 0.160     | 0.153 | 0.067 |
| LANV          | 0.120 | 0.102 | 0.063      | 0.100 | 0.102 | 0.102  | 0.116 | 0.085 | 0.107 | 0.123 | 0.095 | 0.098 | 0.103 | 0.104 | 0.112     | 0.107 | 0.059 |
| LANV-like     | 0.120 | 0.099 | 0.063      | 0.102 | 0.097 | 0.107  | 0.110 | 0.085 | 0.097 | 0.110 | 0.095 | 0.097 | 0.095 | 0.097 | 0.104     | 0.099 | 0.059 |
| LANV-2        | 0.123 | 0.102 | 0.063      | 0.100 | 0.100 | 0.104  | 0.108 | 0.085 | 0.094 | 0.112 | 0.095 | 0.102 | 0.092 | 0.094 | 0.101     | 0.097 | 0.059 |
| ALPA          | 0.142 | 0.114 | 0.071      | 0.110 | 0.112 | 0.112  | 0.125 | 0.094 | 0.110 | 0.112 | 0.105 | 0.097 | 0.109 | 0.112 | 0.119     | 0.114 | 0.074 |
| RIOMM*        | 0.131 | 0.131 | 0.097      | 0.132 | 0.137 | 0.126  | 0.149 | 0.091 | 0.133 | 0.147 | 0.105 | 0.103 | 0.132 | 0.132 | 0.143     | 0.136 | 0.075 |
| ANJV*         | 0.059 | 0.059 | 0.063      | 0.044 | 0.059 | 0.051  | 0.081 | 0.070 | 0.051 | 0.066 | 0.062 | 0.059 | 0.051 | 0.066 | 0.081     | 0.066 | 0.060 |
| ANJV          | 0.112 | 0.086 | 0.063      | 0.092 | 0.107 | 0.107  | 0.121 | 0.089 | 0.104 | 0.110 | 0.100 | 0.092 | 0.102 | 0.104 | 0.112     | 0.107 | 0.059 |
| RIOMV-4       | 0.133 | 0.107 | 0.088      | 0.095 | 0.107 | 0.100  | 0.113 | 0.075 | 0.106 | 0.112 | 0.095 | 0.088 | 0.100 | 0.102 | 0.110     | 0.105 | 0.074 |
| RIOMV-3       | 0.112 | 0.091 | 0.080      | 0.083 | 0.097 | 0.095  | 0.113 | 0.085 | 0.107 | 0.113 | 0.095 | 0.088 | 0.094 | 0.094 | 0.102     | 0.097 | 0.067 |
| RIOMV Peru    | 0.122 | 0.099 | 0.079      | 0.093 | 0.108 | 0.103  | 0.123 | 0.090 | 0.107 | 0.110 | 0.096 | 0.088 | 0.102 | 0.104 | 0.112     | 0.107 | 0.066 |
| MARV          | 0.122 | 0.101 | 0.088      | 0.092 | 0.105 | 0.100  | 0.116 | 0.090 | 0.104 | 0.107 | 0.095 | 0.088 | 0.100 | 0.099 | 0.107     | 0.102 | 0.066 |
| RIOMV Bolivia | 0.126 | 0.102 | 0.080      | 0.092 | 0.105 | 0.098  | 0.121 | 0.085 | 0.104 | 0.110 | 0.095 | 0.088 | 0.097 | 0.099 | 0.107     | 0.097 | 0.066 |
| JUQV          |       | 0.000 | 0.008      | 0.055 | 0.045 | 0.063  | 0.067 | 0.051 | 0.082 | 0.083 | 0.060 | 0.065 | 0.039 | 0.051 | 0.060     | 0.054 | 0.029 |
| ARAUV         | 0.037 |       | 0.008      | 0.047 | 0.042 | 0.057  | 0.062 | 0.051 | 0.071 | 0.071 | 0.060 | 0.065 | 0.035 | 0.044 | 0.051     | 0.047 | 0.029 |
| JUQV-Like*    | 0.103 | 0.086 |            | 0.023 | 0.031 | 0.047  | 0.055 | 0.047 | 0.023 | 0.039 | 0.024 | 0.031 | 0.023 | 0.039 | 0.055     | 0.039 | 0.039 |
| ANDV          | 0.201 | 0.193 | 0.245      |       | 0.040 | 0.042  | 0.050 | 0.018 | 0.050 | 0.061 | 0.037 | 0.039 | 0.033 | 0.033 | 0.040     | 0.035 | 0.015 |
| TUNV          | 0.199 | 0.206 | 0.235      | 0.188 |       | 0.026  | 0.028 | 0.014 | 0.054 | 0.059 | 0.051 | 0.047 | 0.026 | 0.023 | 0.030     | 0.025 | 0.007 |
| CASV-2        | 0.193 | 0.187 | 0.218      | 0.174 | 0.132 |        | 0.023 | 0.009 | 0.061 | 0.071 | 0.055 | 0.056 | 0.035 | 0.023 | 0.030     | 0.026 | 0.007 |
| CASV          | 0.199 | 0.196 | 0.262      | 0.193 | 0.144 | 0.146  |       | 0.005 | 0.062 | 0.074 | 0.060 | 0.060 | 0.042 | 0.030 | 0.037     | 0.033 | 0.014 |
| CASV*         | 0.176 | 0.170 | 0.258      | 0.161 | 0.119 | 0.116  | 0.008 |       | 0.037 | 0.046 | 0.055 | 0.051 | 0.027 | 0.018 | 0.032     | 0.018 | 0.007 |
| PERV          | 0.211 | 0.213 | 0.216      | 0.213 | 0.216 | 0.216  | 0.226 | 0.191 |       | 0.040 | 0.042 | 0.043 | 0.040 | 0.042 | 0.049     | 0.044 | 0.015 |
| MACV          | 0.230 | 0.228 | 0.264      | 0.217 | 0.214 | 0.233  | 0.220 | 0.202 | 0.195 |       | 0.018 | 0.017 | 0.054 | 0.056 | 0.063     | 0.059 | 0.029 |
| ARQV*         | 0.197 | 0.191 | 0.232      | 0.170 | 0.171 | 0.176  | 0.213 | 0.210 | 0.160 | 0.153 |       | 0.005 | 0.037 | 0.046 | 0.060     | 0.046 | 0.030 |
| PARV*         | 0.200 | 0.203 | 0.259      | 0.187 | 0.181 | 0.193  | 0.203 | 0.202 | 0.178 | 0.157 | 0.073 |       | 0.038 | 0.047 | 0.060     | 0.047 | 0.022 |
| ORNV          | 0.184 | 0.194 | 0.228      | 0.184 | 0.183 | 0.185  | 0.195 | 0.169 | 0.192 | 0.204 | 0.178 | 0.183 |       | 0.012 | 0.018     | 0.014 | 0.015 |
| BMJV          | 0.195 | 0.190 | 0.239      | 0.180 | 0.184 | 0.165  | 0.175 | 0.149 | 0.207 | 0.208 | 0.192 | 0.216 | 0.139 |       | 0.007     | 0.002 | 0.000 |
| BMJV-NEBU     | 0.195 | 0.198 | 0.245      | 0.194 | 0.168 | 0.151  | 0.190 | 0.166 | 0.208 | 0.208 | 0.190 | 0.217 | 0.143 | 0.074 |           | 0.009 | 0.014 |
| LECV          | 0.198 | 0.195 | 0.240      | 0.175 | 0.178 | 0.155  | 0.167 | 0.143 | 0.193 | 0.205 | 0.201 | 0.213 | 0.140 | 0.090 | 0.106     |       | 0.000 |
| ACPV*         | 0.238 | 0.230 | 0.246      | 0.253 | 0.216 | 0.233  | 0.215 | 0.219 | 0.188 | 0.231 | 0.240 | 0.255 | 0.192 | 0.105 | 0.139     | 0.121 |       |



**Supplemental Figure 1.** ML phylogeny of the RdRp gene (L segment). BSV values > 70 are shown above each node.

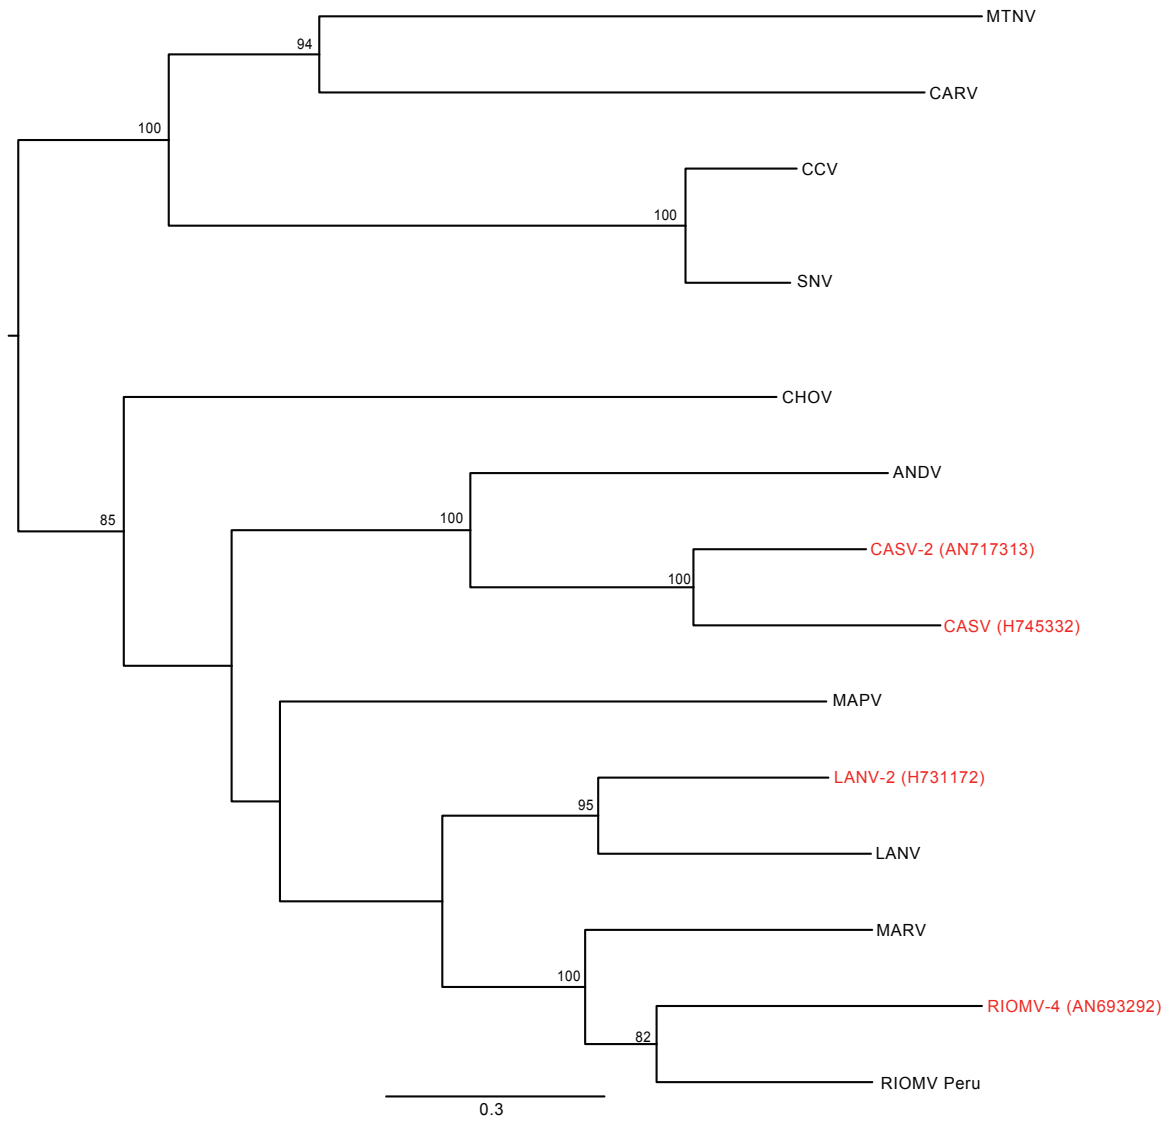

**Supplemental Figure 2.** Methods and results of the Bayesian phylogeographic models.

a) K-means (6) clustering of all South American hantaviruses (SAmC).

| Virus     | Group |
|-----------|-------|
| ACPV      | 6     |
| ALPA      | 2     |
| ANDV      | 4     |
| ANJV      | 1     |
| ARAUV     | 5     |
| ARQV      | 5     |
| BMJV      | 2     |
| BMJV-NEBU | 2     |
| CASV      | 3     |
| CASV-2    | 3     |
| ITPV 16   | 2     |
| ITPV 37   | 2     |
| ITPV 38   | 2     |
| JABV      | 2/5   |
| JUQV      | 2     |
| LANV      | 2     |
| LANV-2    | 3     |
| LECV      | 6     |
| MACV      | 6     |
| MARV      | 1     |
| ORNV      | 2     |
| PARV      | 5     |
| PERV      | 6     |
| RIOMM     | 1     |
| RIOMV     | 3     |
| RIOMV-3   | 3     |
| RIOMV-4   | 3     |
| TUNV      | 3     |

b) Values of the posterior-simulation Akaike information criterion (AICM) for each geographic distribution model of (A) SAmC, and (B) ANDV clade hantaviruses only (AVC). AICM values for each metric of geographic classification are given for priors informed by the normalized inverse distance between the centroids of the total geographical area for each location state (light grey) and for priors set to equal rates of migration between all location states (dark grey).

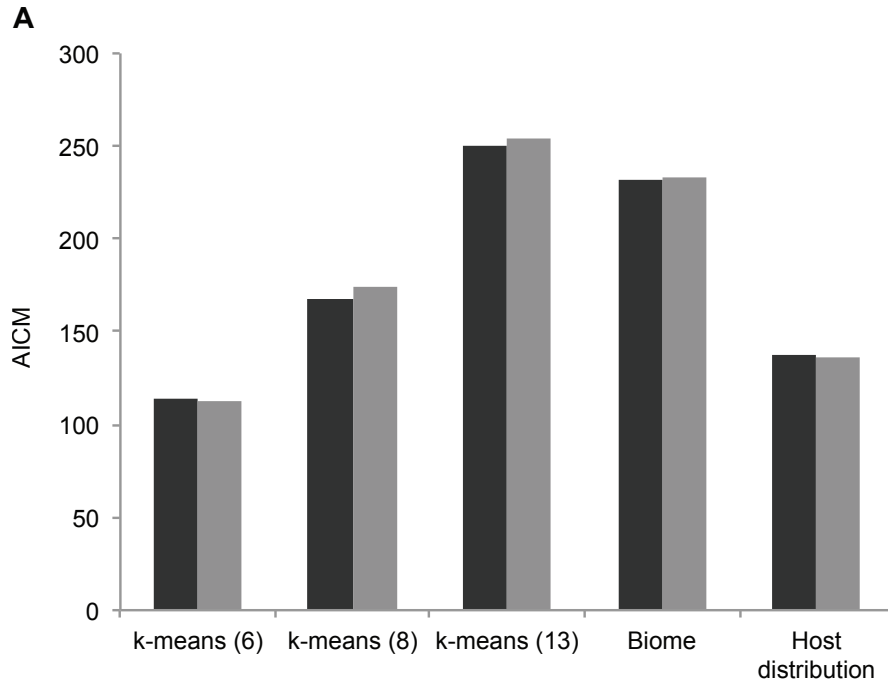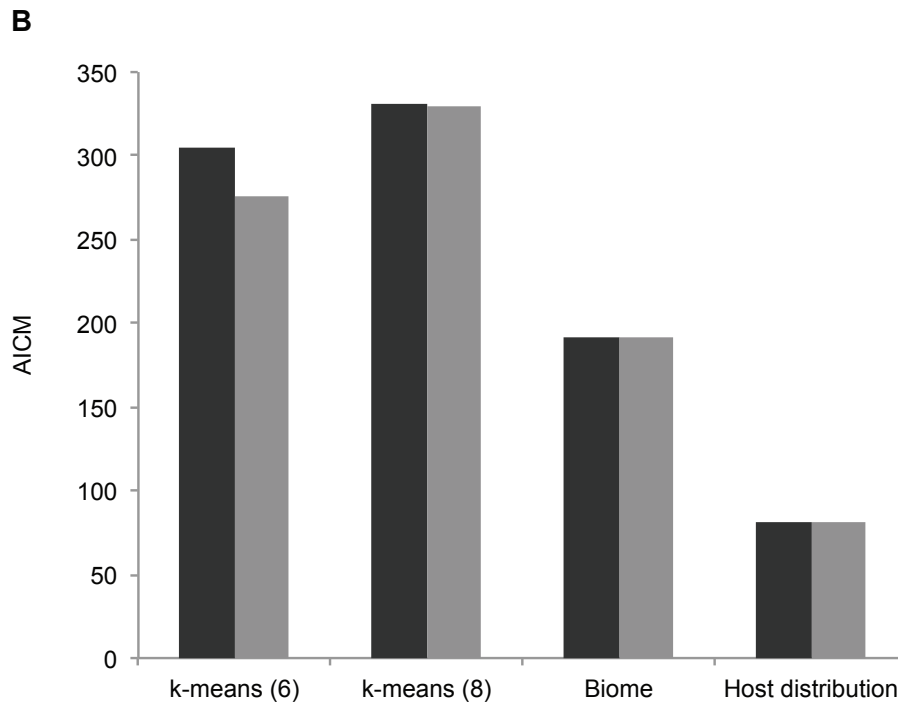

c) Significant migration routes (BF > 5) for (A) SAmC and (B) AVC. The numbers of individual migration events are shown in parentheses.

A

| <b>K-means (6)</b> | Group 1<br>(NE Brazil &<br>Fr. Guiana) | Group 2<br>(SC Brazil, Bolivia,<br>Paraguay) | Group 3<br>(NC Brazil) | Group 5<br>(E Brazil) | Group 6<br>(Uruguay &<br>N Argentina) |
|--------------------|----------------------------------------|----------------------------------------------|------------------------|-----------------------|---------------------------------------|
| Group 1            | -                                      |                                              |                        |                       |                                       |
| Group 2            |                                        | -                                            | 13 (3)                 | 48 (2)                | 9 (2)                                 |
| Group 3            | 78 (3)                                 |                                              | -                      |                       |                                       |
| Group 5            |                                        |                                              |                        | -                     |                                       |
| Group 6            |                                        |                                              |                        | 6 (1)                 | -                                     |

| <b>Host distribution</b> | N. benefactus | N. lasiurus | O. chacoensis | O. flavescens | O. microtis | O. fornesi | A. azarae |
|--------------------------|---------------|-------------|---------------|---------------|-------------|------------|-----------|
| N. benefactus            | -             | 8 (1)       |               |               |             |            |           |
| N. lasiurus              |               | -           |               |               |             |            |           |
| O. chacoensis            |               |             | -             | 10 (1)        |             |            |           |
| O. flavescens            |               |             | 13 (1)        | -             |             |            |           |
| O. microtis              |               |             |               |               |             | 8 (1)      |           |
| O. fornesi               |               |             |               |               |             |            |           |
| A. azarae                | 5 (1)         |             |               |               |             |            | -         |

B

| <b>Host distribution</b> | N. benefactus | N. lasiurus | O. chacoensis | O. flavescens |
|--------------------------|---------------|-------------|---------------|---------------|
| N. benefactus            | -             | 6 (1)       |               |               |
| N. lasiurus              |               | -           |               |               |
| O. chacoensis            |               |             | -             | 7 (1)         |
| O. flavescens            |               |             | 8 (1)         | -             |

d) Significant migrations rates for SAMC with k-means (6). The intensity of the arrow color is proportional to the Bayes Factor.

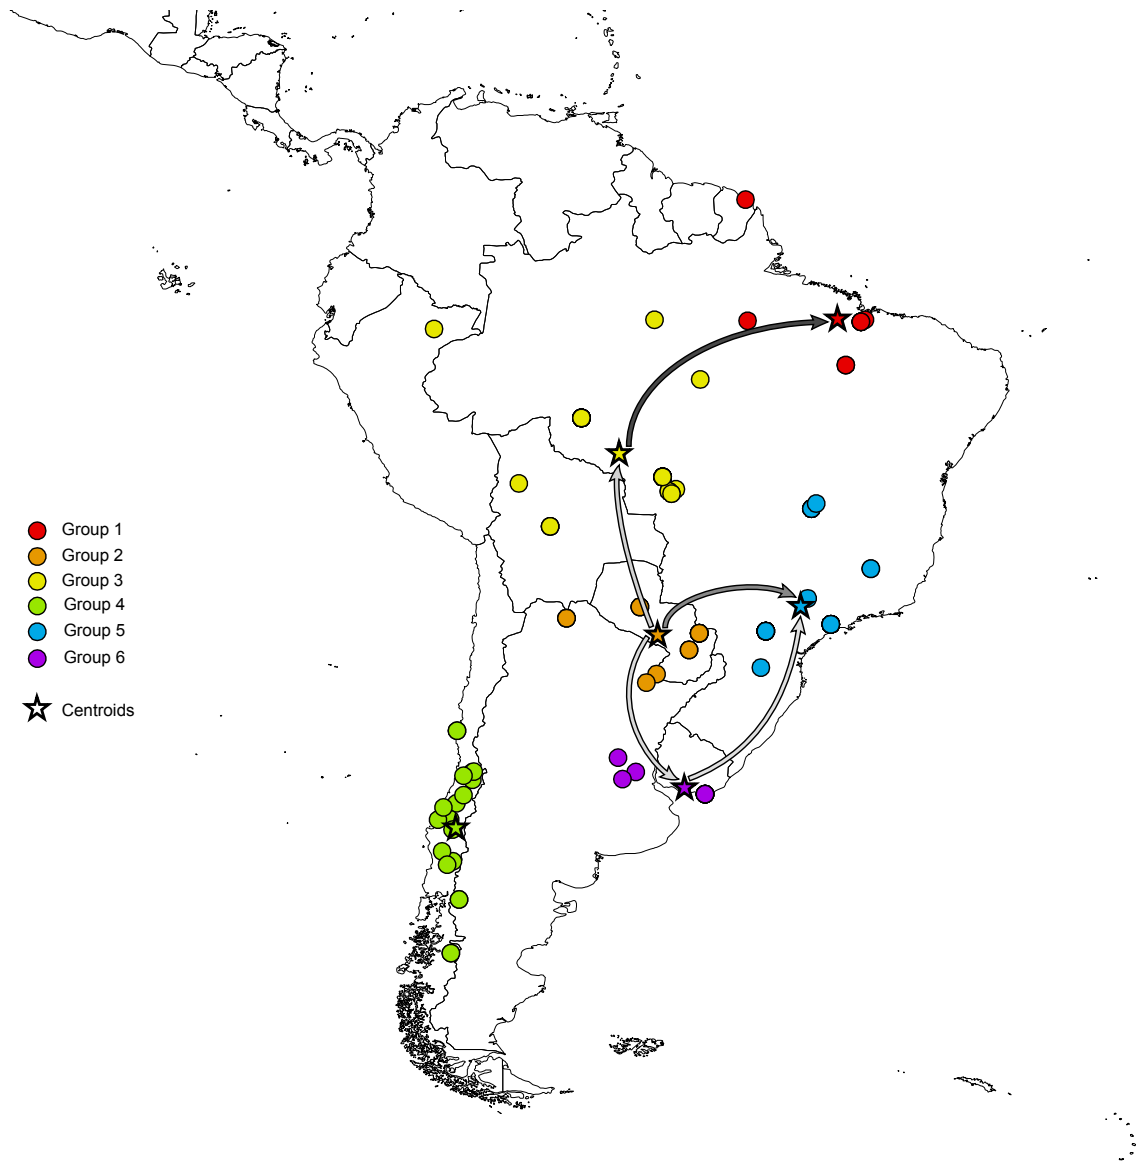

**Supplemental Figure 3.** Neighbor-joining tree of the short fragment (n = 31, 435 nt) of all available LANV and LANV-2 nucleocapsid sequences. The taxon shown in red is the original LANV strain from Paraguay, while the taxon shown in blue is the first representative of LANV-2 from Brazil (originally Laguna Negra-like virus). The three taxa in green are from *Calomys callidus*, described as the host of LANV. The sequences in purple are from the same HPS case, sequenced independently in Rosa et al. 2012 and this study. With the addition of LANV-2 sequence HMT 08, the separation between LANV and LANV-2 is clearly visible. The scale bar indicates the total number of substitutions.

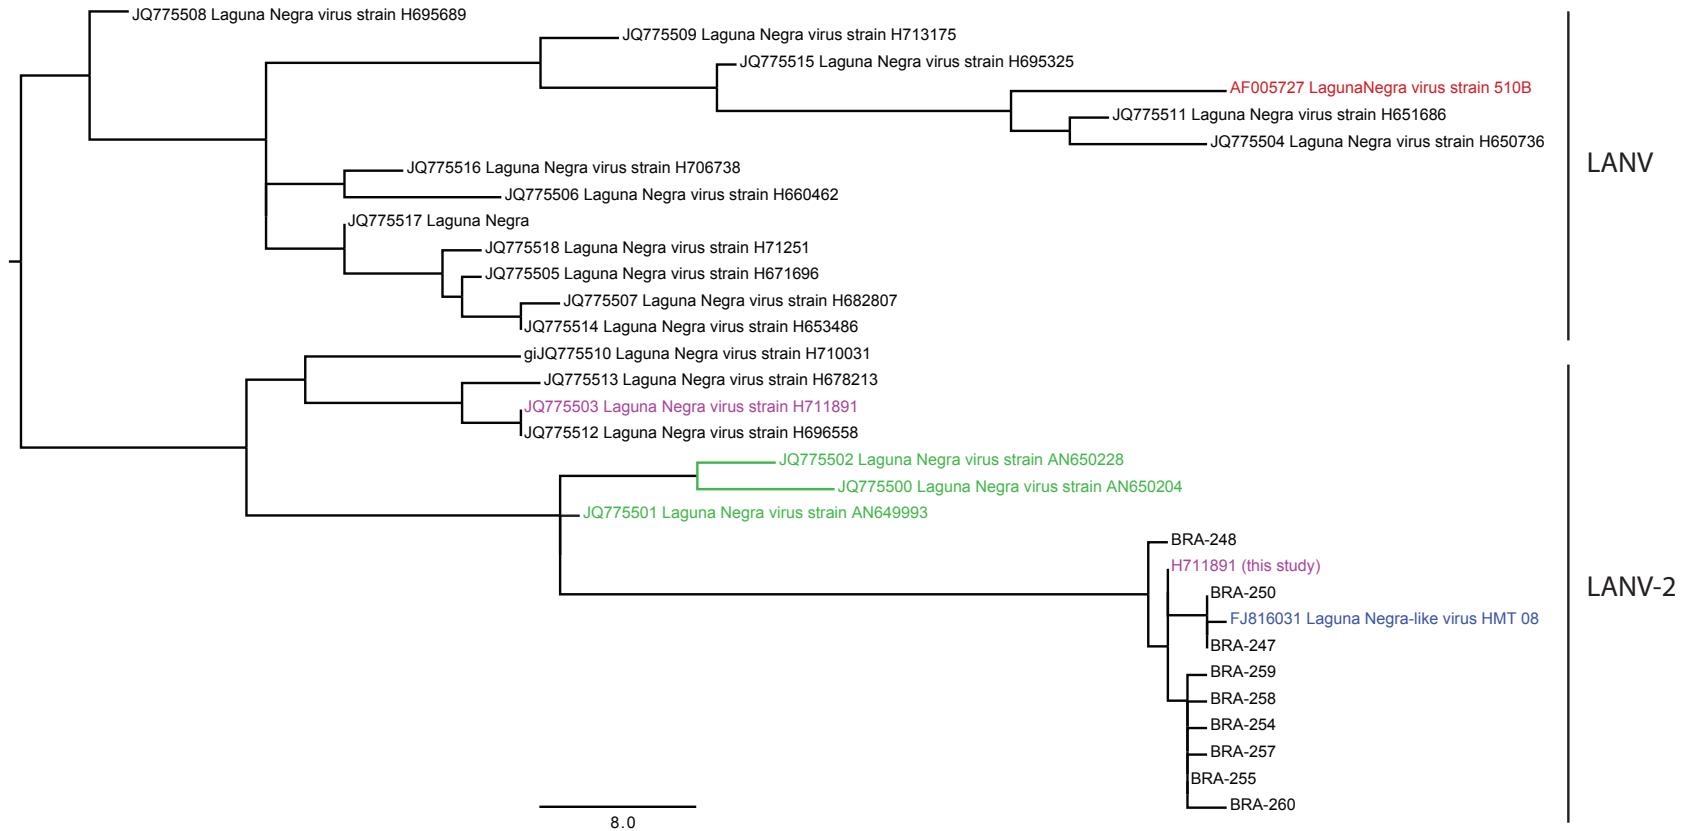

Supplement: JVI.02341-12_zjv999097041so1.pdf [file JVI.02341-12_zjv999097041so1.pdf]
